# Supplementary material for: Local protons enhance photocatalytic CO2 reduction by porphyrinic zirconium-organic frameworks
Source: Royal Society of Chemistry journal article supplement (doi:10.1039/d4qm00187g), 2024-01-01
Supplement: d4qm00187g1.pdf [file d4qm00187g1.pdf]

## Supplementary Information

### **Local protons enhance photocatalytic CO<sub>2</sub> reduction by porphyrinic zirconium-organic frameworks**

Xue Zhao,<sup>a</sup> Chang-Yan Zhu,<sup>b</sup> Jun-Sheng Qin,<sup>\*ac</sup> Heng Rao,<sup>ac</sup> Dong-Ying Du,<sup>b</sup> Min Zhang,<sup>\*b</sup> Ping She,<sup>ac</sup> Li Li<sup>a</sup> and Zhong-Min Su<sup>\*a</sup>

<sup>a</sup> State Key Laboratory of Inorganic Synthesis and Preparative Chemistry, College of Chemistry, Jilin University, Changchun 130012, P.R. China. E-mail: qin@jlu.edu.cn, suzhongmin@jlu.edu.cn

<sup>b</sup> Department of Chemistry, Northeast Normal University, Changchun 130024, P.R. China. E-mail: mzhang@nenu.edu.cn

<sup>c</sup> International Center of Future Science, Jilin University, Changchun 130012, P.R. China

## Contents

|                                                        |            |
|--------------------------------------------------------|------------|
| <b>Section S1. Materials and instrumentation .....</b> | <b>S3</b>  |
| <b>Section S2. Experimental details .....</b>          | <b>S3</b>  |
| <b>Section S3. Catalyst characterization .....</b>     | <b>S5</b>  |
| <b>Section S4. Computational details.....</b>          | <b>S6</b>  |
| <b>Section S5. Supplementary figures.....</b>          | <b>S7</b>  |
| <b>References.....</b>                                 | <b>S13</b> |

## Section S1. Materials and instrumentation

All chemicals were used as purchased without further purification. Powder X-ray diffraction (PXRD) was carried out with a Bruker D8-Focus Bragg-Brentano X-ray Powder Diffractometer.  $^1\text{H}$  Nuclear magnetic resonance ( $^1\text{H}$  NMR) spectra were collected on a Varian 300 MHz NMR spectrometer. Mass spectra (MS) were measured by Bruker Autoflex speed TOF/TOF. Gas sorption measurements were conducted using a PhysChem iPore 620 automated surface area and micropore analyzer. The ultraviolet-visible (UV-vis) diffuse reflectance was measured by a SHIMADZU U-4100 UV-vis spectrophotometer using barium sulfate ( $\text{BaSO}_4$ ) as a standard. Gas chromatography was performed using GC-2014 gas chromatography. The thermogravimetric analysis (TGA) curves of the samples were carried out using a TGA Q500 analyzer heated from room temperature to  $800\text{ }^\circ\text{C}$  in air with the heating rate of  $10\text{ }^\circ\text{C}\cdot\text{min}^{-1}$ . The femtosecond time-resolved transient absorption (fs-TA) spectra were measured by Helios Fire Transient Absorption spectrometer (Ultrafast Systems LLC).

## Section S2. Experimental details

### *Syntheses of linkers*

**Scheme S1.** The synthetic strategy for  $\text{FeTCBPP-OCH}_3$ .

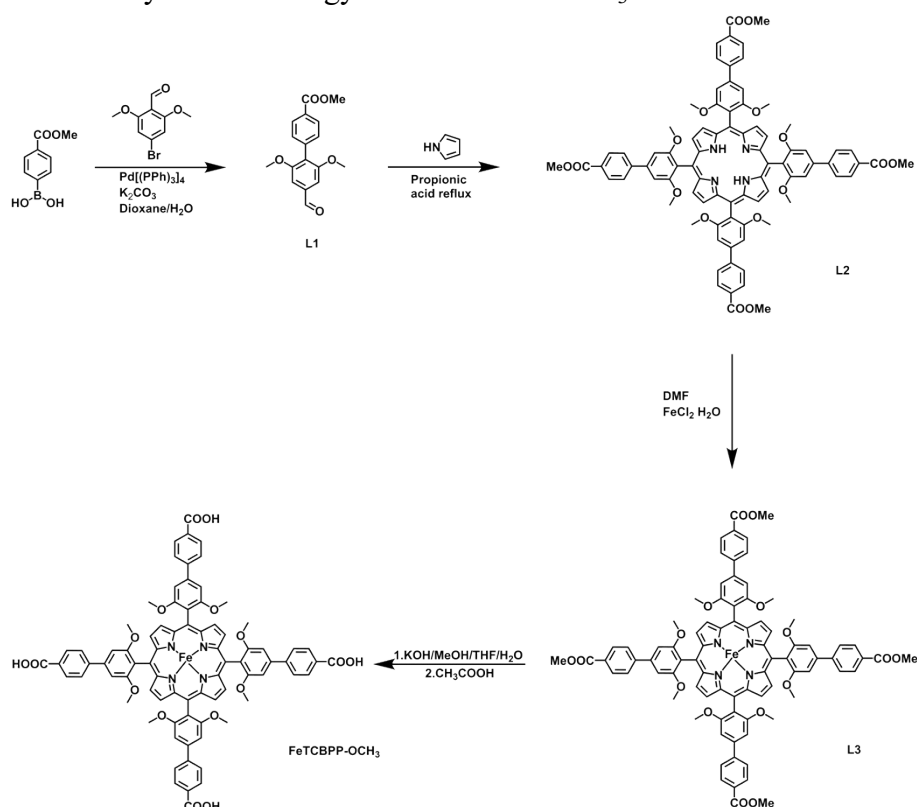

**Synthesis of L1.** 4-Bromo-2,6-dimethoxybenzaldehyde (25 g, 102 mmol) and 4-methoxy carbonylphenylboronic acid (18.36 g, 102 mmol) were dissolved in a degassed *p*-dioxane/ $\text{H}_2\text{O}$  mixture (v/v 4:1, 500 mL).  $\text{K}_2\text{CO}_3$  (28.19 g, 204 mmol) and  $\text{Pd}[(\text{PPh})_3]_4$  (1 g, 0.86 mmol) were continuously added to the mixture and heated under reflux for

12 h. The reaction was monitored by TLC (thin-layer chromatography). After the mixture was cooled to ambient temperature, it was extracted with  $\text{CH}_2\text{Cl}_2$  and  $\text{H}_2\text{O}$ . The aqueous phase was washed twice with  $\text{CH}_2\text{Cl}_2$ . The combined organic phases were dried ( $\text{Na}_2\text{SO}_4$ ), filtrated and evaporated. The crude product was absorbed on silica-gel and subjected to column chromatography (petroleum ether : EtOAc = 100:5) to give the product as a white solid (L1).  $^1\text{H}$  NMR (300 MHz,  $\text{CDCl}_3$ , 25 °C):  $\delta$  = 10.54 (s, 1H), 8.14 (d, 2H), 7.66 (d, 2H), 6.77 (s, 2H), 3.98 (s, 6H), 3.96 (s, 3H) ppm.

**Synthesis of L2.** L1 (1 g, 3.33 mmol) was dissolved in propionic acid (30 mL). The resulted solution was heated to 130 °C. A solution of pyrrole (0.23 mL, 3.33 mmol) in propionic acid (0.84 mL) was then added dropwise slowly, and the solution was stirred for 12 h. After the mixture was cooled to room temperature,  $\text{H}_2\text{O}$  was introduced. Then, dark red solid was collected by filtration. The crude product was absorbed on silica-gel and subjected to column chromatography ( $\text{CH}_2\text{Cl}_2$  : MeOH = 100:1) to give the product as a purple solid (L2).  $^1\text{H}$  NMR (300 MHz,  $\text{CDCl}_3$ , 25 °C):  $\delta$  = 8.77 (s, 8H), 8.26 (d, 8H), 7.99 (d, 8H), 7.23 (d, 8H), 4.01 (s, 12H), 3.63 (S, 24H), -2.44 (s, 2H) ppm.

**Syntheses of L3 and FeTCBPP-OCH<sub>3</sub>.** A mixture of L2 (1 g, 0.7 mmol) and  $\text{FeCl}_2 \cdot 4\text{H}_2\text{O}$  (0.28 mg, 1.4 mmol) was added into DMF, and the resultant mixture was refluxed for 18 h. After the mixture was cooled to room temperature,  $\text{H}_2\text{O}$  was introduced. The resultant precipitate was filtered and washed with HCl (0.01 M) and  $\text{H}_2\text{O}$  twice, to give the product as a dark red solid (L3). And then L3 was added and stirred in a mixed solvent of THF (35 mL) and MeOH (35 mL), to which a solution of KOH (2.98 g, 53.2 mmol) in  $\text{H}_2\text{O}$  (35 mL) was added. The mixture was then refluxed for 48 h. After the mixture was cooled to room temperature, THF and MeOH were evaporated. Additional water was added to the resultant water phase. The resulting mixture was acidified with  $\text{CH}_3\text{COOH}$  until pH < 3. The red/black solid (FeTCBPP-OCH<sub>3</sub>) was collected by filtration, washed with water three times, and then dried in vacuum.

#### *Syntheses of MOF-OCH<sub>3</sub> and MOF-OH*

**Synthesis of MOF-OCH<sub>3</sub>.** A mixture of 10 mg of  $\text{ZrCl}_4$ , 200 mg of benzoic acid and 10 mg of FeTCBPP-OCH<sub>3</sub> were dissolved with 2 mL DEF in a 5 mL vial. The vial was sealed and sonicated for about 10 min until the formation of a homogeneous solution. The reaction was heated in an isothermal oven at 120 °C for 48 h, yielding dark red cubic crystals. For  $^1\text{H}$  NMR measurement, the crystals of MOF-OCH<sub>3</sub> (no Fe) were digested by 10 M  $\text{H}_2\text{SO}_4$  aqueous solution, and then the mixture was centrifugated and washed with water for three times. The resulted solid was dried in 100 °C oven and then dissolved in 0.5 mL  $\text{DMSO}-d_6$ .

**Synthesis of MOF-OH.** MOF-OCH<sub>3</sub> (400 mg) in dry dichloromethane (25 mL) at -20 °C was added to BBr<sub>3</sub> (500 mL). The mixture was stirred for 12 h at room temperature, then placed in ice water and filtered. The resulting black crystals of MOF-OH were washed with methanol for three times. For <sup>1</sup>H NMR measurement, the crystals of MOF-OH (no Fe) were digested by 10 M H<sub>2</sub>SO<sub>4</sub> aqueous solution, and then the mixture was centrifuged and washed with water for three times. The resulted solid was dried in 100 °C oven and then dissolved in 0.5 mL DMSO-*d*<sub>6</sub>. For MS measurement, the treatment of samples was same as that for NMR, but tetrahydrofuran was used as the solvent.

### Section S3. Catalyst characterization

#### *Ultrafast Transient Absorption (TA) Measurement*

Femtosecond TA measurements were performed at room temperature in a Helios Fire spectrometer (Ultrafast Systems LLC) with pump and probe beams derived from an amplified Ti: sapphire laser system (Coherent Astrella, 800 nm, 5.5 mJ pulse<sup>-1</sup>, 35 fs, and 1 kHz repetition rate). Custom designed fiber-coupled alignment-free spectrometer with a 1024 pixel CMOS sensor (spectral response: 200 – 1000 nm) was used as VIS/UV-VIS detector. Spectral acquisition rate up to 2400 spectra·s<sup>-1</sup>. ADC resolution 16 bit. White light continuum (420 – 760 nm) generated by rotated CaF<sub>2</sub> plate was used as probe beam. The experimental data were fitted to a multiexponential decay function convoluted with the instrument response function.

Samples for TA experiments were prepared by dispersing 1 mg of MOFs in 1 mL of DMF.

#### *Electrochemical measurements*

All the electrochemical measurements were conducted in a three-electrode cell connected to an electrochemical workstation (CHI660E). To prepare working electrodes, 1 mg of samples were dispersed in a mixture consisting of 1 mL ethanol and 100 μL 5% Nafion by ultrasonication for 2 h. For the test of Mott-Schottky plot, 80 μL suspension was casted in a 1 × 1 cm<sup>2</sup> window on an FTO glass and dried at room temperature to serve as the working electrode, Ag/AgCl electrode and Pt electrode were used as the reference electrode and counter electrode, respectively. 0.2 M Na<sub>2</sub>SO<sub>4</sub> aqueous solution was used as the electrolyte.

#### *Photocatalytic CO<sub>2</sub> reduction*

1 mg photocatalyst was evacuated and purged with CO<sub>2</sub> for several times. A mixture of 5 mL MeCN, 3% TFE and 0.025 M BIH solution that pre-degassed with CO<sub>2</sub> to remove the dissolved O<sub>2</sub>, was injected into the reaction flask. Then the solution was irradiated with a LED lamp (λ = 420 nm). The catalytic system was kept at room temperature by circulating condensate. The yields of reaction products were examined by using the

flame ionization detector (FID, for detecting CO) and thermal conductivity detector (TCD, for detecting H<sub>2</sub>) of a gas chromatograph S7 (GC2014, Ar carrier, Shimadzu).

#### *In-situ Attenuated Total Reflection Fourier-Transform Infrared Spectroscopy*

*In-situ* infrared testing was performed on a Bruker infrared meter. The total reflection accessory was VeeMaxTMIII. First, a layer of catalyst was loaded on the germanium crystal of the ATR fitting. Then carbon dioxide atmosphere was introduced after adding a trace amount of water. At last, visible light was turned on and the IR signal was in situ collected through an MCT detector along with the reaction.

#### **Section S4. Computational details**

Spin-polarized density functional theory (DFT)<sup>1</sup> calculations were performed using the Vienna ab initio simulation package (VASP).<sup>2</sup> Generalized gradient approximation with Perdew-Burke-Ernzerhof functional was used for describing the exchange-correlation potential.<sup>3</sup> The fully relaxed geometric optimization of **MOF-OH** and **MOF-OCH<sub>3</sub>** was conducted until meeting the convergence criterion (10<sup>-5</sup> eV for total energy change and 0.05 eV Å<sup>-1</sup> for the maximum forces on each atom). The energy cutoff was set as 400 eV. The DFT-D3 method was used for van der Waals corrections.<sup>4</sup> The Gibbs free energy diagram for CO<sub>2</sub> reduction reaction was calculated using the computational hydrogen electrode (CHE) model developed by Nørskov et al.<sup>5, 6</sup> The Gibbs free energy change ( $\Delta G$ ) of each elementary step was computed by the following equation:

$$\Delta G = \Delta E + \Delta E_{zpe} - T\Delta S$$

where  $\Delta E_{zpe}$  and  $\Delta S$  represented zero-point energy and entropy, respectively,  $T$  was set at room temperature (298.15 K).

## Section S5. Supplementary figures

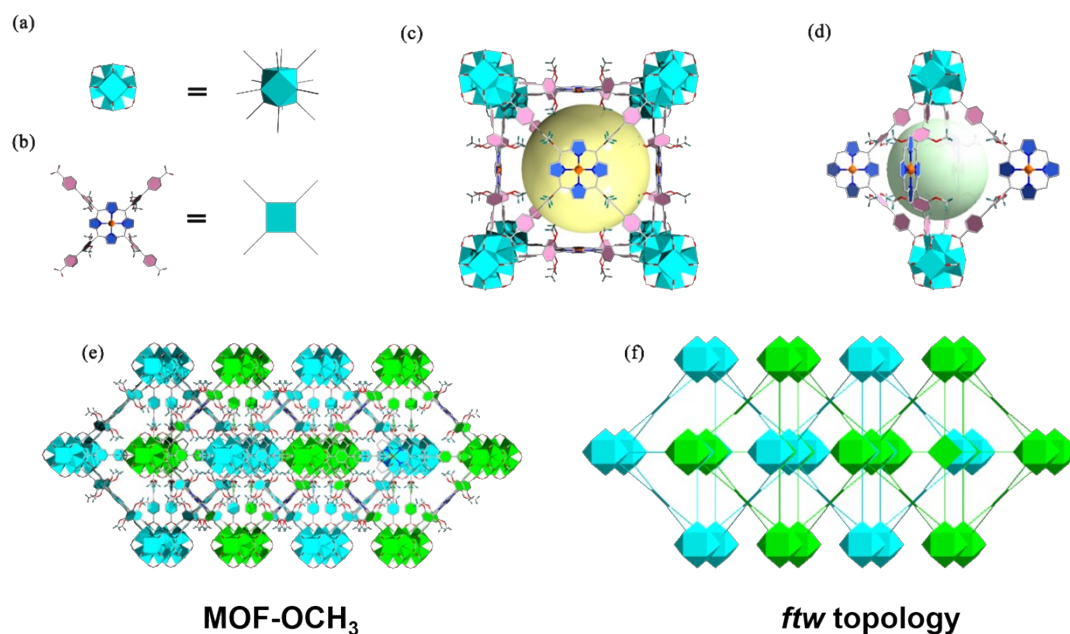

**Fig. S1.** The structure of MOF- $OCH_3$ : (a) 12-connected  $Zr_6O_4(OH)_4$  unit, (b) 4-connected organic linker, (c) the cubic cage constructed from six FeTCBPP- $OCH_3$  fragments and eight  $Zr_6O_4(OH)_4$  clusters, and (d) the octahedral cage constructed from four FeTCBPP- $OCH_3$  fragments and two  $Zr_6O_4(OH)_4$  clusters, (e) and (f) 3D structure and *ftw* topology, respectively. Color codes:  $ZrO_8$  polyhedron, cyan polyhedra; C, gray; O, red; N, blue; Fe, orange; H, olive or omitted for clarity.

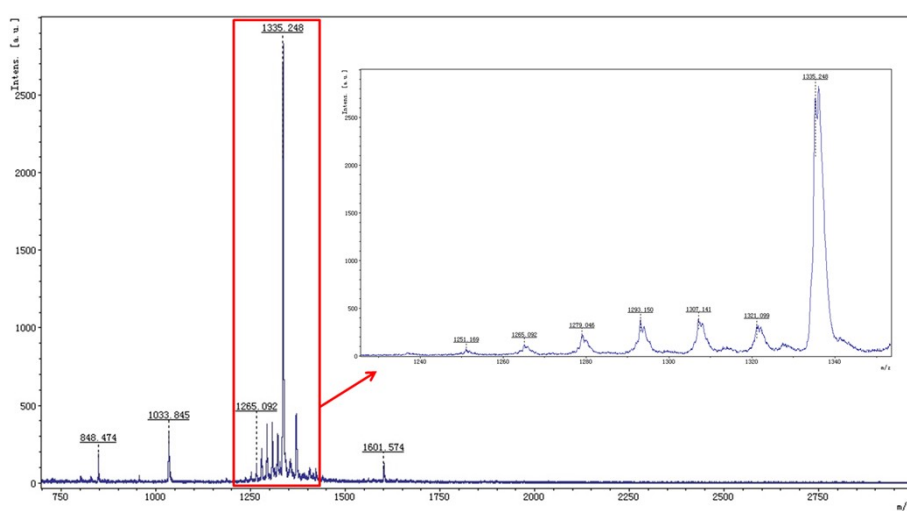

**Fig. S2.** Mass spectrum of MOF-OH. Inset: partial enlargement.

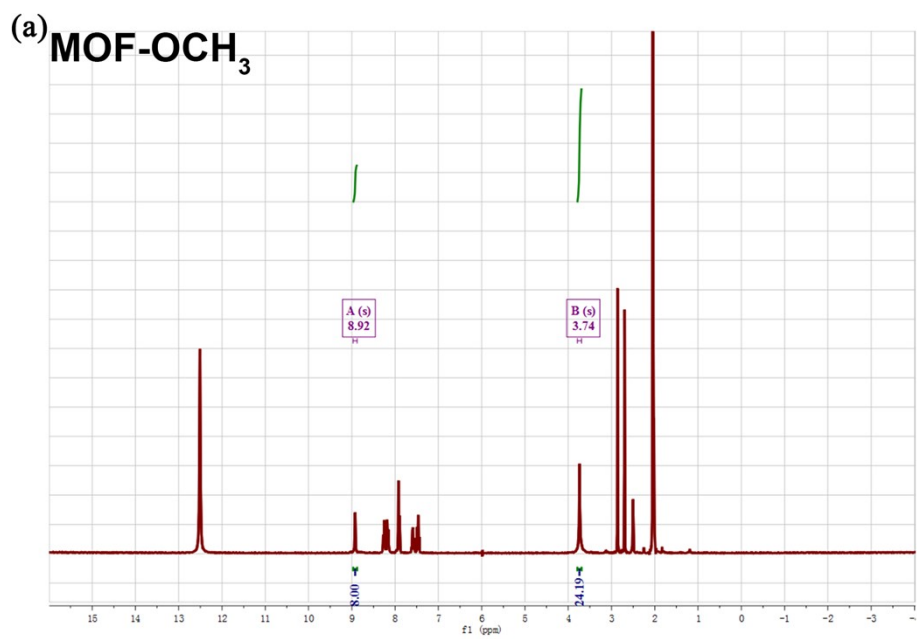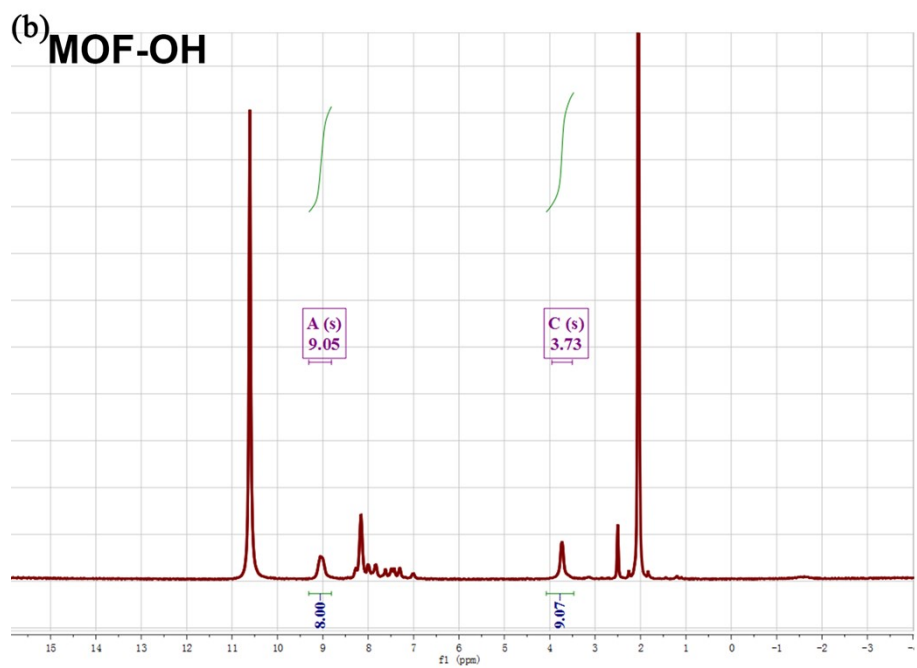

**Fig. S3.** <sup>1</sup>H NMR spectra of (a) **MOF-OCH<sub>3</sub>** and (b) **MOF-OH**, respectively.



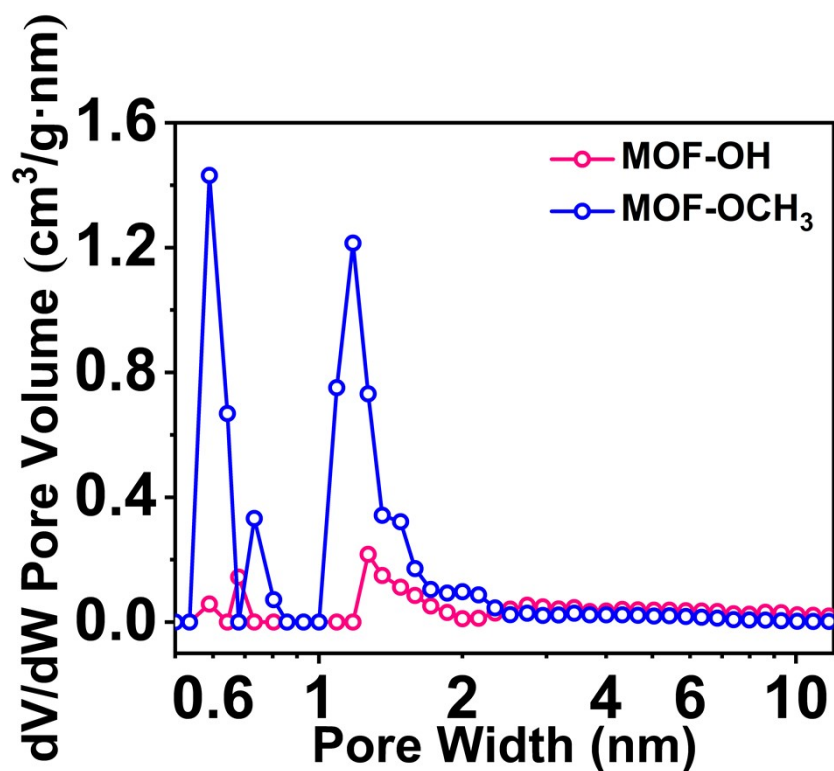

Fig. S4. The corresponding pore size distribution of MOF-OCH<sub>3</sub> and MOF-OH, respectively.

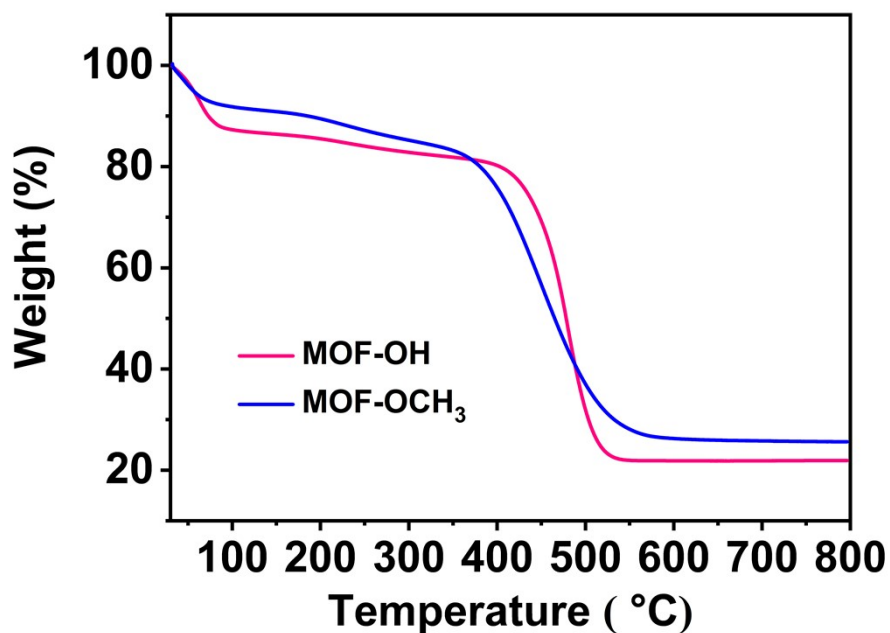

Fig. S5. TGA curves of as-prepared MOF-OCH<sub>3</sub> and MOF-OH, respectively.

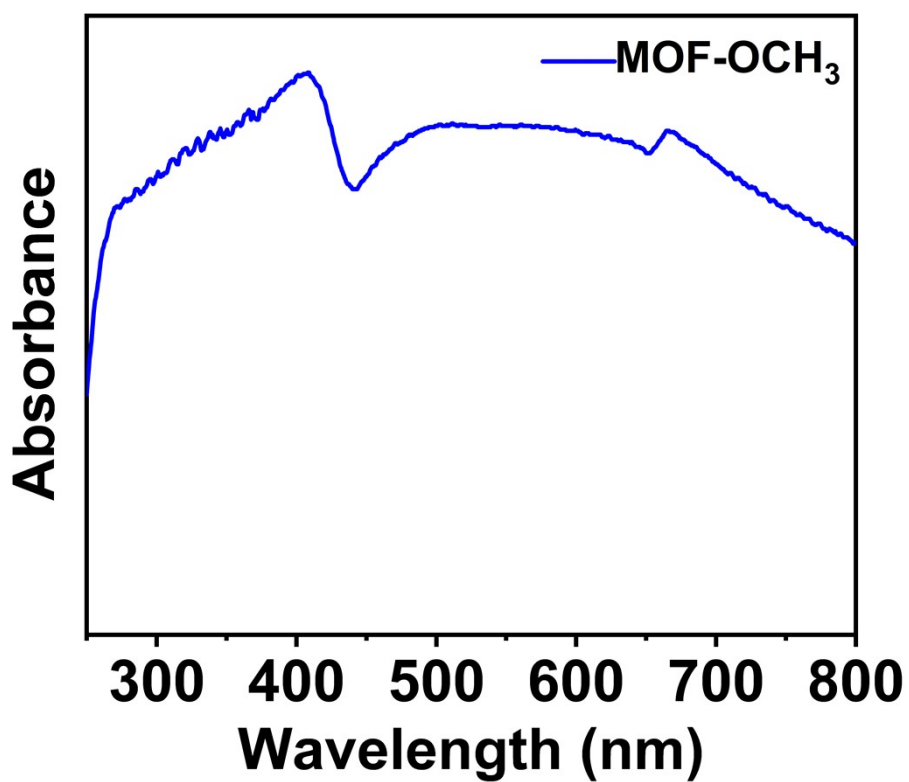

Fig. S6. UV-vis spectrum of MOF-OCH<sub>3</sub>.

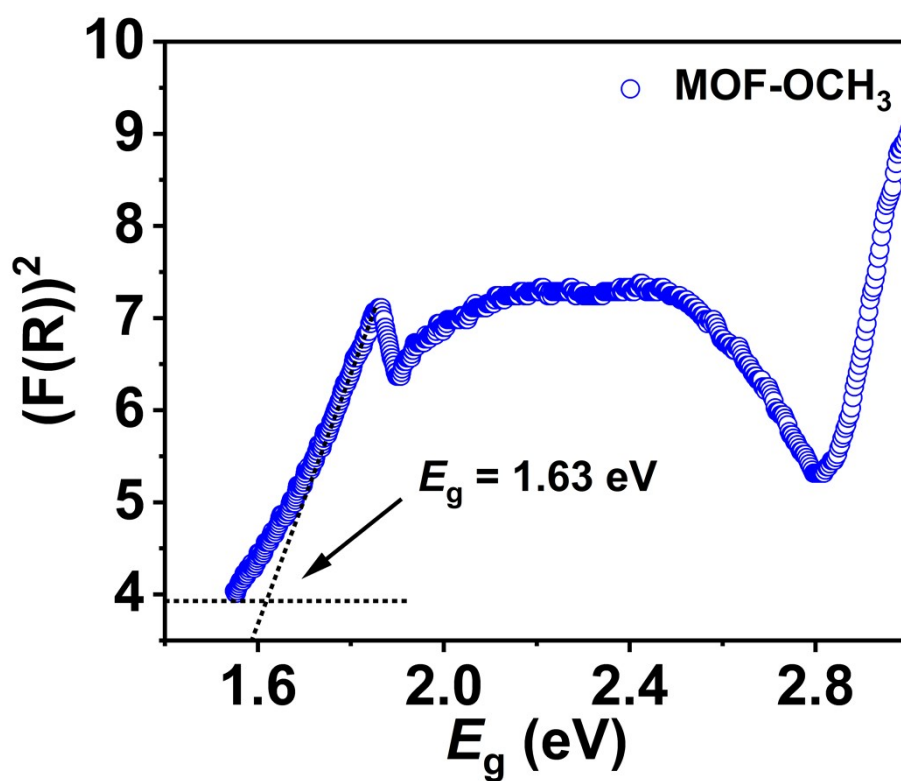

Fig. S7. DRS of MOF-OCH<sub>3</sub> via K-M transformation.

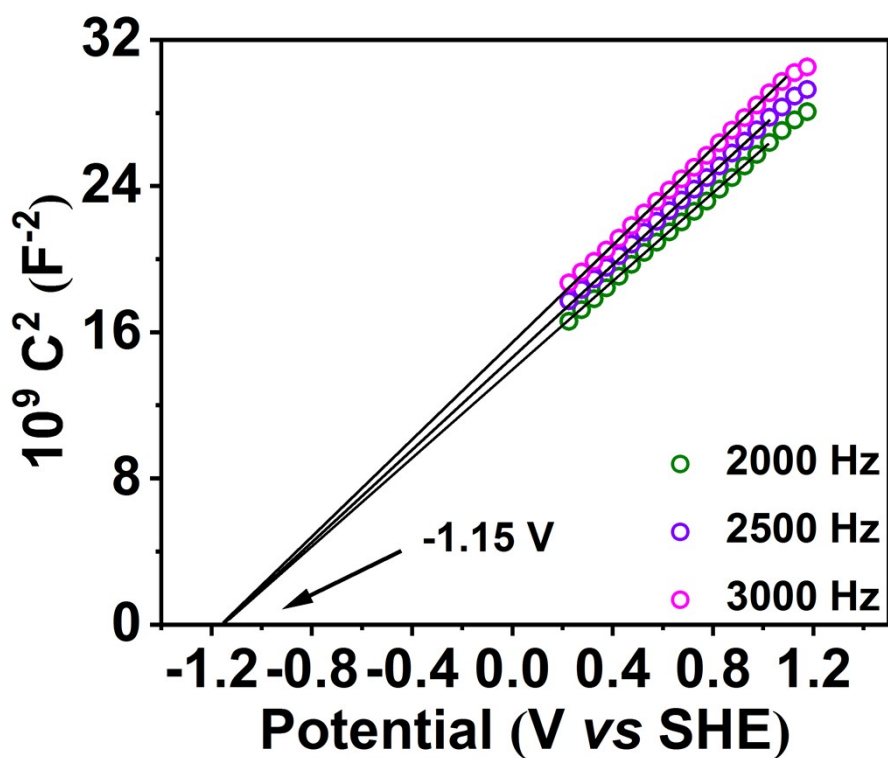

Fig. S8. Mott-Schottky plots of the as-prepared MOF-OCH<sub>3</sub> electrode.

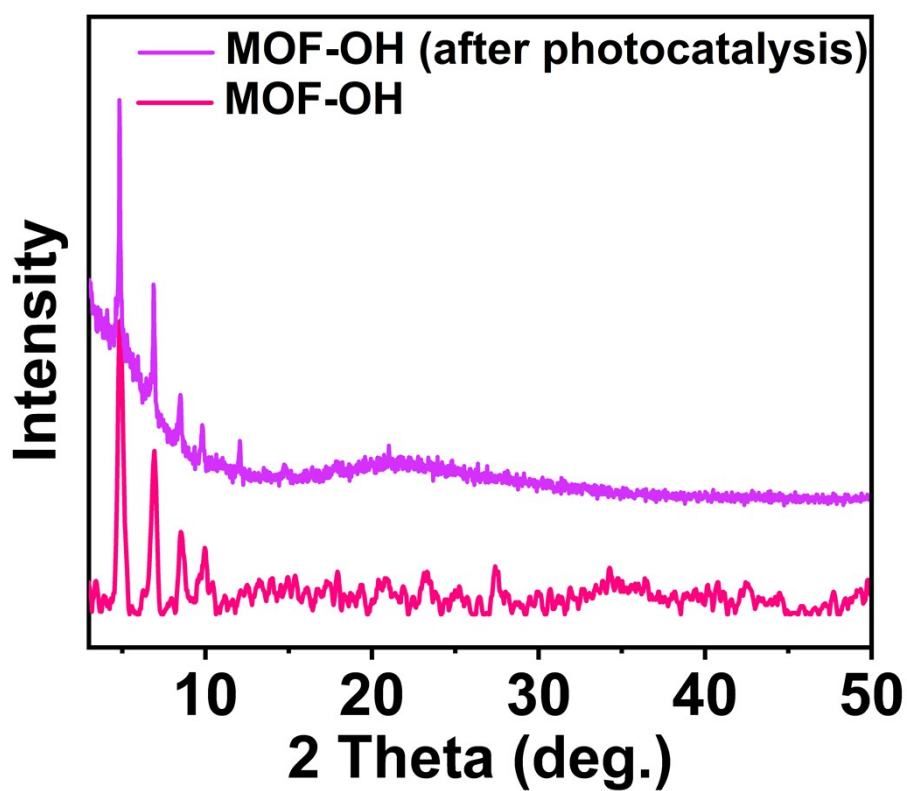

Fig. S9. PXRD patterns of MOF-OH before and after the photocatalytic CO<sub>2</sub> reduction.

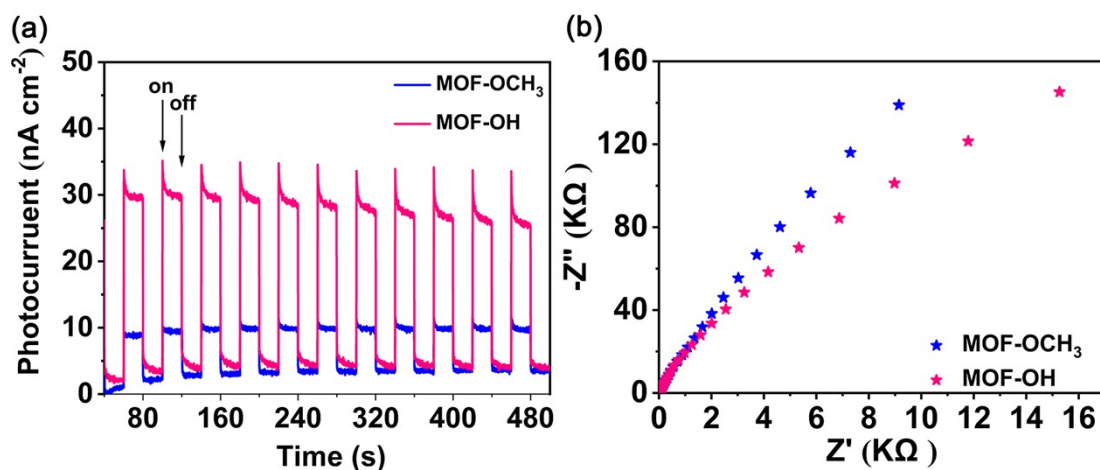

Fig. S10. Transient photocurrent responses of **MOF-OH** and **MOF-OCH<sub>3</sub>**, and (b) EIS Nyquist plots of **MOF-OH** and **MOF-OCH<sub>3</sub>**, respectively.

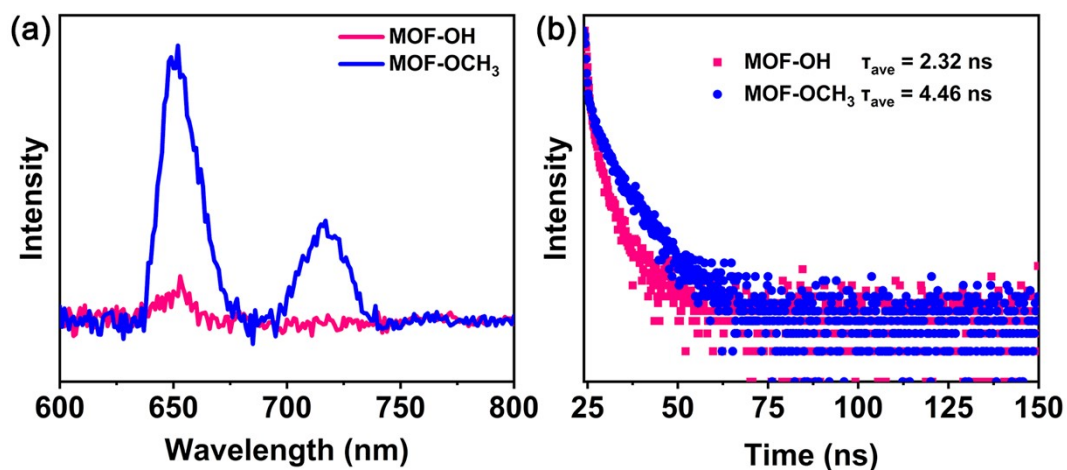

Fig. S11. (a) PL spectra and (b) time-resolved absorption spectra of **MOF-OH** and **MOF-OCH<sub>3</sub>**, respectively.

## References

1. D. J. Singh and J. Ashkenazi, Magnetism with generalized-gradient-approximation density functionals, *Phys. Rev. B*, 1992, **46**, 11570-11577.
2. B. Barbiellini, M. J. Puska, T. Korhonen, A. Harju, T. Torsti and R. M. Nieminen, Calculation of positron states and annihilation in solids: A density-gradient-correction scheme, *Phys. Rev. B*, 1996, **53**, 16201-16213.
3. G. Kresse and D. Joubert, From ultrasoft pseudopotentials to the projector augmented-wave method, *Phys. Rev. B*, 1999, **59**, 1758-1775.
4. S. Grimme, Semiempirical GGA-type density functional constructed with a long-range dispersion correction, *J. Comput. Chem.*, 2006, **27**, 1787-1799.
5. J. Rossmeisl, A. Logadottir and J. K. Nørskov, Electrolysis of water on (oxidized) metal surfaces, *Chem. Phys.*, 2005, **319**, 178-184.
6. J. K. Nørskov, J. Rossmeisl, A. Logadottir, L. Lindqvist, J. R. Kitchin, T. Bligaard and H. Jónsson, Origin of the Overpotential for Oxygen Reduction at a Fuel-Cell Cathode, *J. Phys. Chem. B*, 2004, **108**, 17886-17892.
